# Supplementary material
Source: PubMed Central journal article supplement (PMC3121560)
Supplement: NIHMS301176-supplement-supplemental_data.pdf [file NIHMS301176-supplement-supplemental_data.pdf]

|     | EBS1                                                        | EBS2 |     |
|-----|-------------------------------------------------------------|------|-----|
| -99 | CACACAG <b>GGA</b> GTCCGGCTG <b>GGA</b> AGGGCCCATCC         |      | -67 |
| -99 | CACACCAG <b><u>GAG</u></b> TTCCGGCTG <b>GGA</b> AGGGCCCATCC |      | -67 |
|     | mEBS1                                                       |      |     |
| -99 | CACACAG <b>GGA</b> GTCCGGCTG <b><u>GAG</u></b> AGGGCCCATCC  |      | -67 |
|     | mEBS2                                                       |      |     |

Supplemental Figure S I. Construction of luciferase reporter vectors containing genomic region upstream of the miR-126/*Egfl7* gene. Mutations were made to two of the ETS binding sites, EBS1 extending from -93 to -97, and EBS2 extending from -80 to -84, in the *Egfl7* proximal promoter constructs and transfected into HUVEC with RL-TK control vector.

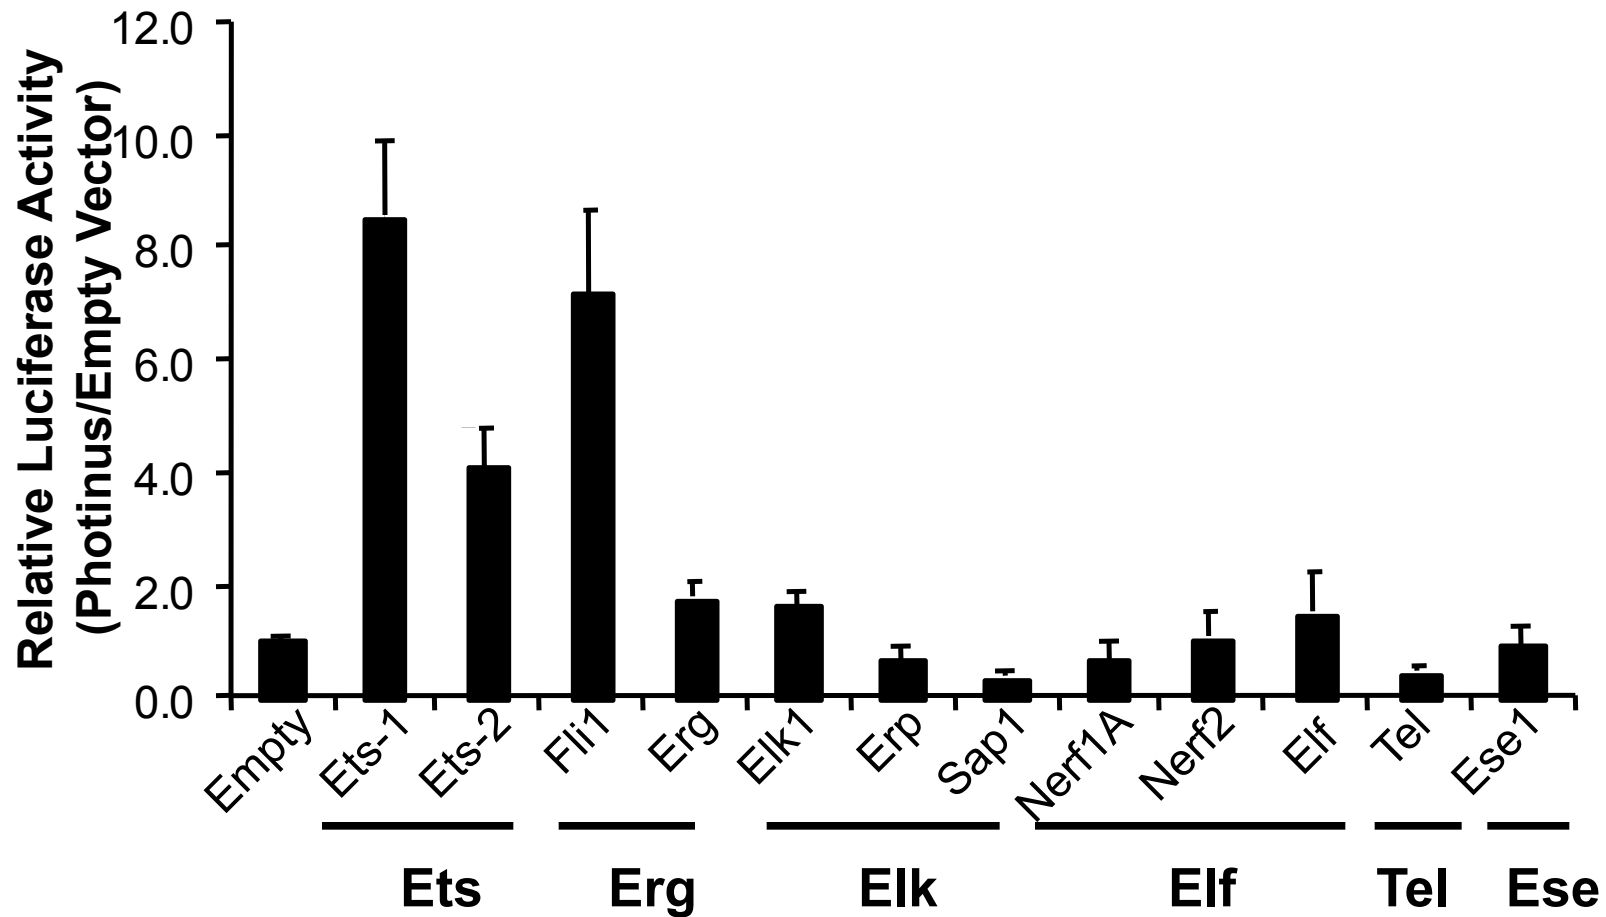

Supplemental Figure S II. Ets-1 and Ets-2 regulate the expression of miR-126. (A) Ets-1, Ets-2, and Fli1 over-expression increase transactivation of the full length EGFL7 proximal promoter in HEK293 cells. The -1670 *Egfl7* proximal promoter constructs and PCI-Ets factor expression constructs were co-transfected into HEK 293.

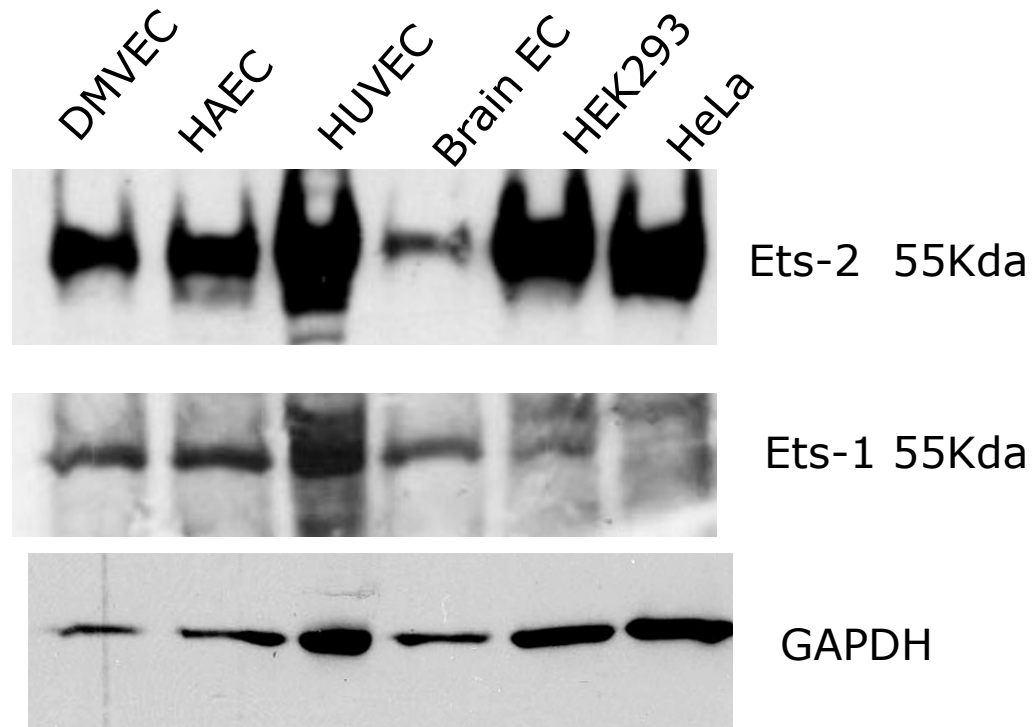

Supplemental Figure S III. Ets-1 and Ets-2 expression profile in different types of cells. Total protein was harvested and analyzed by immunoblotting for Ets-1 or Ets-2.
